# Supplementary material
Source: Research Square preprint supplement (doi:10.21203/rs.3.rs-9719353/v1)
Supplement: Supplementary file 1 [file 28023e12b7fdbd4de46b35a3.xlsx]

## Sheet: Sheet1
TL (cm)	Weight (gm)
16.2	32.72
13.7	24.56
16.3	39.87
12.5	16.36
14	21.5
15.2	28.8
13	14.84
16.5	35.17
13.7	19.93
15.3	30.05
17.1	42.9
15.8	35.52
15.2	26.59
15.2	26.56
12.8	18.44
10.9	10.3
10.9	10.52
13.6	18.56
11.5	12.15
13.4	19.15
12	14.8
11.8	16.67
12.4	13.46
11.1	10.92
18.9	56.35
15.6	35.73
15.9	33.25
16.9	33.32
16	27.75
14.1	25.42
15.3	31.5
15.8	29.36
14.2	25.65
15	24.52
14	23.34
14	21.93
13.7	20.2
11.5	11.24
12.1	12.82
19.6	67.51
17.5	46.13
16.1	36.64
16.7	37.61
16.2	36
16.1	35.22
15.3	34.45
15	28.45
15	31.8
15.2	31.12
15.2	29.83
13.4	19.27
14.8	27.89
14	22.51
14.3	21.79
13.5	19.95
13.8	20.48
12.8	14.77
18.2	70.62
17.9	69.78
17	52.65
16.5	45.88
16.1	39.2
14.2	35.25
15.5	37.4
14.3	26.4
14.9	35.22
12.3	20.54
10.3	11.08
16	44.71
19.4	65.61
16.9	54.55
19.6	75.79
17.1	55.15
17.5	62.1
11.6	16.5
13.1	26.77
12.9	23.32
12.5	19.62
12.1	18.85
12.4	25.03
12.3	23.53
13.5	26.76
15	34.39
12.8	25.5
13.2	29.5
14.2	31.12
13.3	26.43
13.5	27.32
13.6	23.06
12.2	22.24
11.1	20.02
12.2	19.82
14.3	33.23
16.2	43.12
12.4	30.13
16.4	41.24
12.2	22.54
11.6	19.86
17.3	57.23
18.3	66.12
15.7	38.35
16.5	37.2
12.8	24.2
13.8	27.1
16.5	53.8
12	22.1
18	62.1
13.8	24.2
19.4	73.5
9.1	18
10	13
10	14
19	72.1
22.1	123.51
15	42.4
10.5	13.7
9	12.1
11.1	15.7
7.9	8.8
8	10.2
13.5	22.8
10.4	13.4
12.9	15
11.7	14
15.2	30.1
11.9	16
10.6	14.3
9.5	12.8

## Sheet: Sheet2
Value														TL (cm)	Weight (gm)
TL_mean 43.55366					LWR_table									16.2	132.72
TL_sd 48.32489					Species a b R2 Growth_type K_min K_mean K_max									13.7	24.56
TL_median 21.40000					(Intercept) Nazirator 9.075 -0.02 0.001 Negative allometric 0.001 0.341 1.119									16.3	139.87
TL_min 9.50000														12.5	16.36
TL_max 315.00000														14	21.5
Weight..gm._mean 14.41724														15.2	128.8
Weight..gm._sd 28.33894														13	14.84
Weight..gm._median 7.70000						Parameter Value								16.5	135.17
Weight..gm._min 1.40000						1 a (intercept) 0.653								13.7	19.93
Weight..gm._max 230.00000						2 b (slope) 0.997								15.3	130.05
						3 R² 0.254								17.1	142.9
						4 Growth type (b ≠ 3) Allometric								15.8	35.52
														15.2	126.59
														15.2	126.56
														12.8	118.44
														10.9	10.3
														10.9	10.52
														13.6	18.56
														11.5	12.15
														13.4	19.15
														12	14.8
														11.8	16.67
														12.4	13.46
														11.1	10.92
														18.9	98.35
														15.6	35.73
														15.9	33.25
														16.9	33.32
														16	27.75
														14.1	25.42
														15.3	31.5
														15.8	29.36
														14.2	25.65
														15	24.52
														14	23.34
														14	21.93
														13.7	20.2
														11.5	11.24
														12.1	12.82
														19.6	67.51
														17.5	46.13
														16.1	36.64
														16.7	37.61
														16.2	36
														16.1	35.22
														15.3	34.45
														15	28.45
														15	31.8
														15.2	31.12
														15.2	29.83
														13.4	19.27
														14.8	27.89
														14	22.51
														14.3	21.79
														13.5	19.95
														13.8	20.48
														12.8	14.77
														18.2	150.62
														17.9	136.78
														17	52.65
														16.5	105.88
														16.1	109.2
														14.2	35.25
														15.5	37.4
														14.3	26.4
														14.9	35.22
														12.3	20.54
														10.3	11.08
														16	84.71
														19.4	65.61
														16.9	119.55
														19.6	175.79
														17.1	107.15
														17.5	122.1
														11.6	16.5
														13.1	26.77
														12.9	23.32
														12.5	19.62
														12.1	18.85
														12.4	25.03
														12.3	23.53
														13.5	26.76
														15	34.39
														12.8	28.5
														13.2	109.5
														14.2	131.12
														13.3	116.43
														13.5	117.32
														13.6	123.06
														12.2	92.24
														11.1	30.02
														12.2	39.82
														14.3	43.23
														16.2	153.12
														12.4	30.13
														16.4	151.24
														12.2	90.54
														11.6	119.86
														17.3	175.23
														18.3	166.12
														15.7	138.35
														16.5	157.2
														12.8	124.2
														13.8	127.1
														16.5	158.8
														9.2	32.1
														18	62.1
														13.8	94.2
														19.4	180
														9.1	10
														10	23
														4	8.9
														4.9	70.1
														22.1	233.51
														15	52.4
														10.5	23.7
														9	22.1
														11.1	25.7
														7.9	18.8
														8	10.2
														13.5	32.8
														10.4	23.4
														12.9	25
														11.7	24
														15.2	90.98
														11.9	26
														10.6	24.3
														9.5	22.8
